# Supplementary material for: Investigation on Centrifugally Spun Fibrous PCL/3-Methyl Mannoside Mats for Wound Healing Application
Source: MDPI journal article supplement (doi:10.3390/polym15051293), 2023-03-03
Supplement: s1 [file s1]

# Investigation on Centrifugally Spun Fibrous PCL/3-Methyl Mannoside Mats for Wound Healing Application

Soloman Agnes Mary <sup>1,†</sup>, Naisini Ariram <sup>1,†</sup>, Arun Gopinath <sup>1</sup>, Senthil Kumar Chinnaiyan <sup>1</sup>,  
Iruthayapandi Selestin Raja <sup>2</sup>, Bindia Sahu <sup>1</sup>, Venkateshwarapuram Rengaswami Giri Dev <sup>3</sup>,  
Dong-Wook Han <sup>2,4,\*</sup> and Balaraman Madhan <sup>1,\*</sup>

- <sup>1</sup> Centre for Academic and Research Excellence, CSIR-Central Leather Research Institute Adyar, Chennai 600020, India; agnufss.best@gmail.com (S.A.M.); naisini.ariram@gmail.com (N.A.); arun123gopinath@gmail.com (A.G.); csenthilmpharm@gmail.com (S.K.C.); bindiya1480@gmail.com (B.S.)
- <sup>2</sup> BIO-IT Foundry Technology Institute, Pusan National University, Busan 46241, Republic of Korea; rajaselestin@pusan.ac.kr
- <sup>3</sup> Department of Textile Technology, Anna University, Chennai 600025, India; vrgiridev@gmail.com
- <sup>4</sup> Department of Cogno-Mechatronics Engineering, College of Nanoscience & Nanotechnology, Pusan National University, Busan 46241, Republic of Korea
- \* Correspondence: nanohan@pusan.ac.kr (D.-W.H.); madhan@clri.res.in (B.M.)
- † These authors contributed equally to this work.
-

**Table S1.** Phytochemical Screening of CA extract.

| S. No. | Phytoconstituents | Observation |
|--------|-------------------|-------------|
| 1.     | Tannins           | +           |
| 2.     | Flavonoids        | +           |
| 3.     | Terpenoids        | +           |
| 4.     | Saponins          | -           |
| 5.     | Carbohydrates     | +           |
| 6.     | Glycosides        | +           |
| 7.     | Proteins          | +           |
| 8.     | Anthraquinones    | +           |
| 9.     | Anthocyanins      | +           |

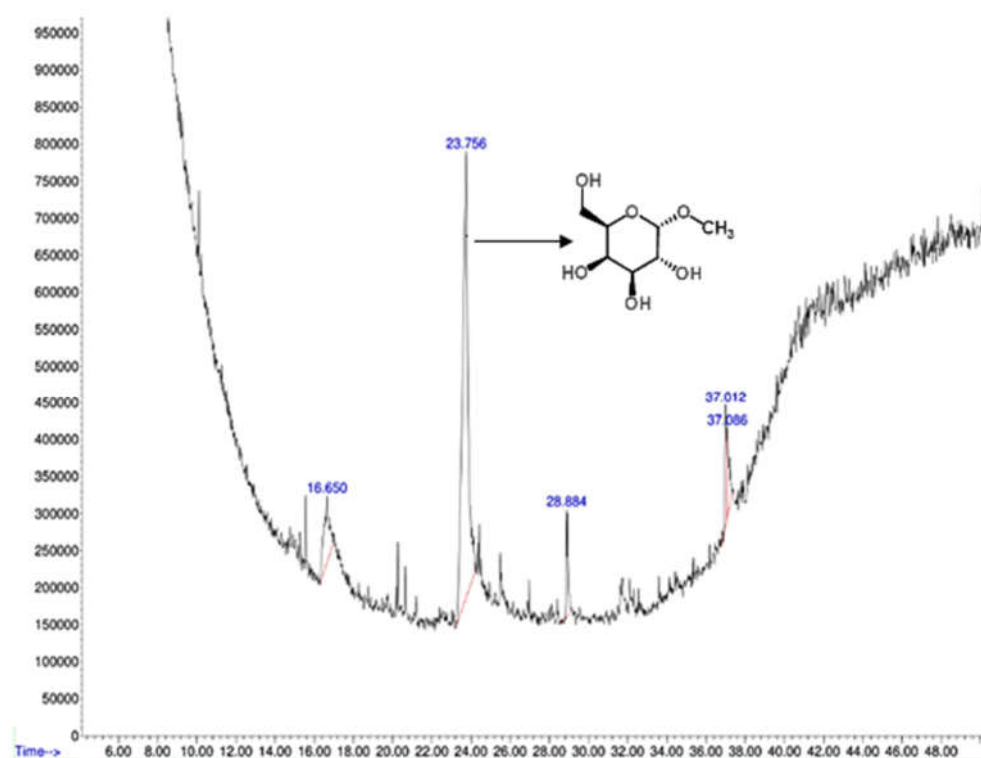

**Figure S1.** Gas chromatography-mass spectrometry chromatogram of chloroform methanolic extract of CA.

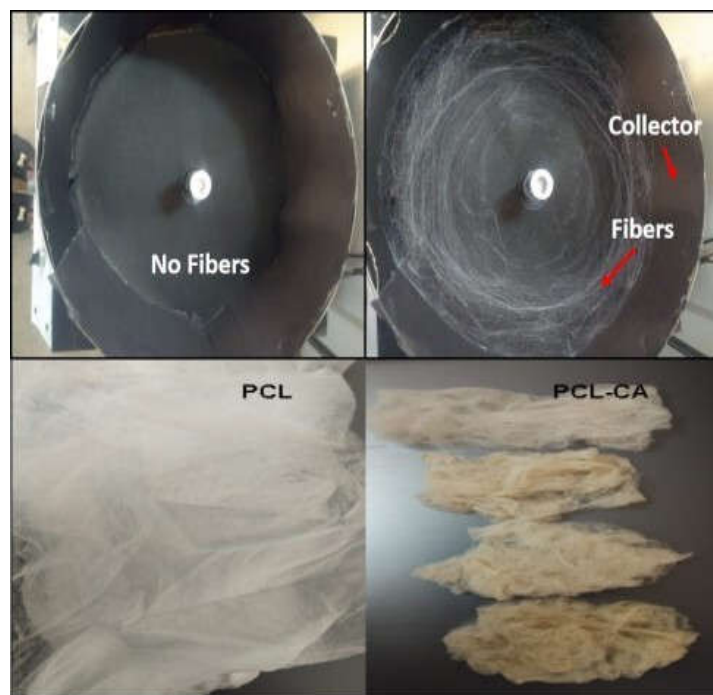

**Figure S2.** Optical images of c-spun PCL and PCL-CA fibrous mats.

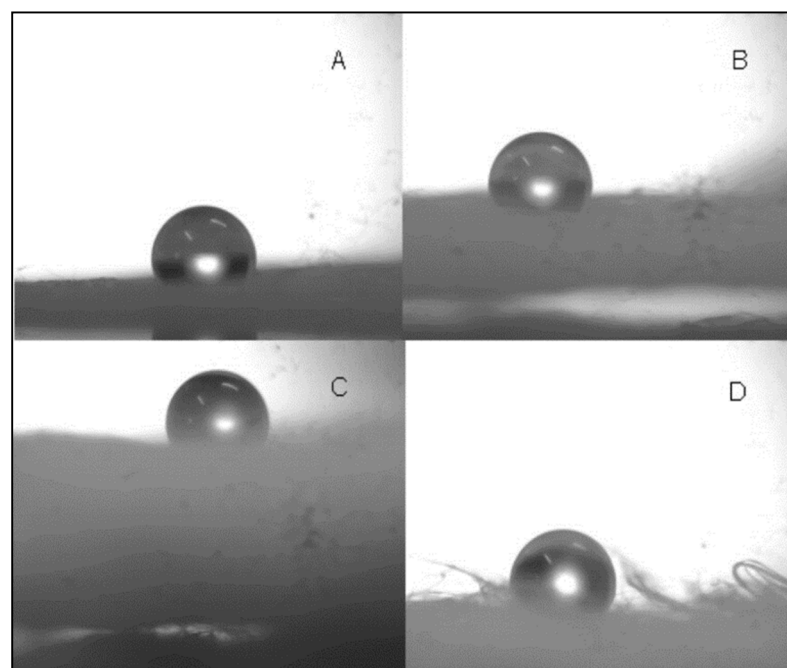

**Figure S3.** Contact angle measurements of C-spun PCL and PCL-CA fiber mats. (A) PCL, (B) PCL+ 0.5% CA, (C) PCL+ 1% CA, and (D) PCL+ 1.5% CA.
